# Supplementary material for: A multi-step model for facilitated unwinding of the yeast U4/U6 RNA duplex
Source: PubMed Central journal article supplement — Nucleic Acids Res. 2016 Aug 2;44(22):10912–28. doi: 10.1093/nar/gkw686 (PMC5159527; doi:10.1093/nar/gkw686), 2016-08-02
Supplement: supp_gkw686_nar-00830-r-2016-File010.pdf [file supp_gkw686_nar-00830-r-2016-File010.pdf]

**Supplemental Information for:**

**A Multi-step Model for Facilitated Unwinding of the Yeast U4/U6 RNA Duplex**

Margaret L. Rodgers, Allison L. Didychuk, Samuel E. Butcher, David A. Brow, and Aaron A. Hoskins

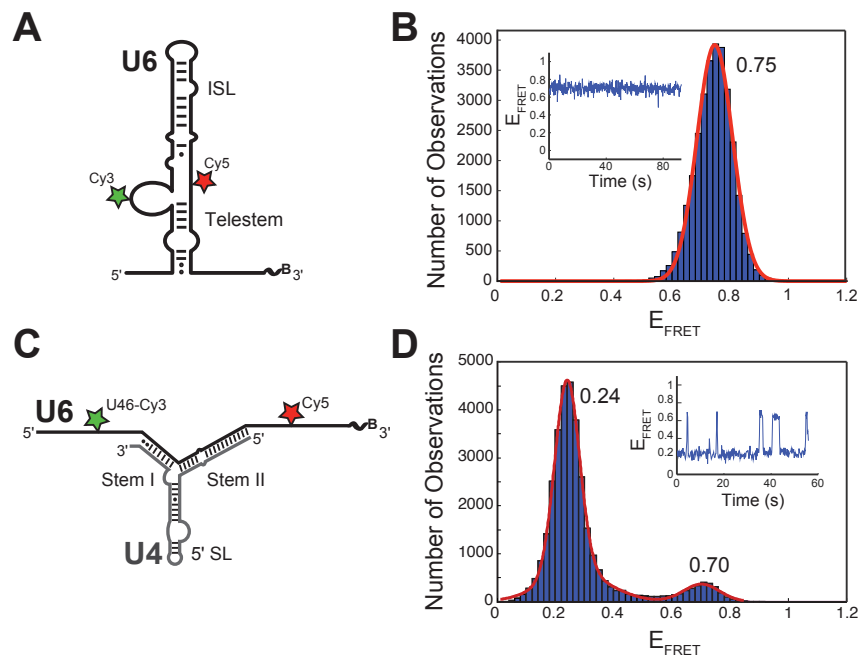

**Supplemental Figure 1.** U6 RNA labeled at U46 exhibits similar smFRET behaviors to RNAs labeled at U54. **(A)** Cartoon of the U46-labeled U6 RNA construct (U6<sub>25-112</sub>) used in smFRET assays. FRET donor (Cy3) and acceptor (Cy5) fluorophores are denoted by green and red stars, respectively. **(B)** Histogram of  $E_{\text{FRET}}$  values obtained from single molecules of U46-labeled U6<sub>25-112</sub> ( $N = 100$ ). The distribution could be fit to a single Gaussian function centered at  $0.75 \pm 0.01$  (red line). No dynamics were observed in single molecule  $E_{\text{FRET}}$  time trajectories (*inset*). **(C)** The U46-labeled U4<sub>WT</sub>/U6<sub>25-112</sub> diRNA used in smFRET assays. **(D)** Histogram of  $E_{\text{FRET}}$  values obtained from single molecules of U46-labeled U4<sub>WT</sub>/U6<sub>25-112</sub> ( $N = 121$ ). The distribution could be fit to a sum of two Gaussian functions centered at  $0.24 \pm 0.01$  and  $0.70 \pm 0.01$  (red line). Dynamics consistent with a reversible two-state conformational transition were apparent in single molecule  $E_{\text{FRET}}$  time trajectories (*inset*).

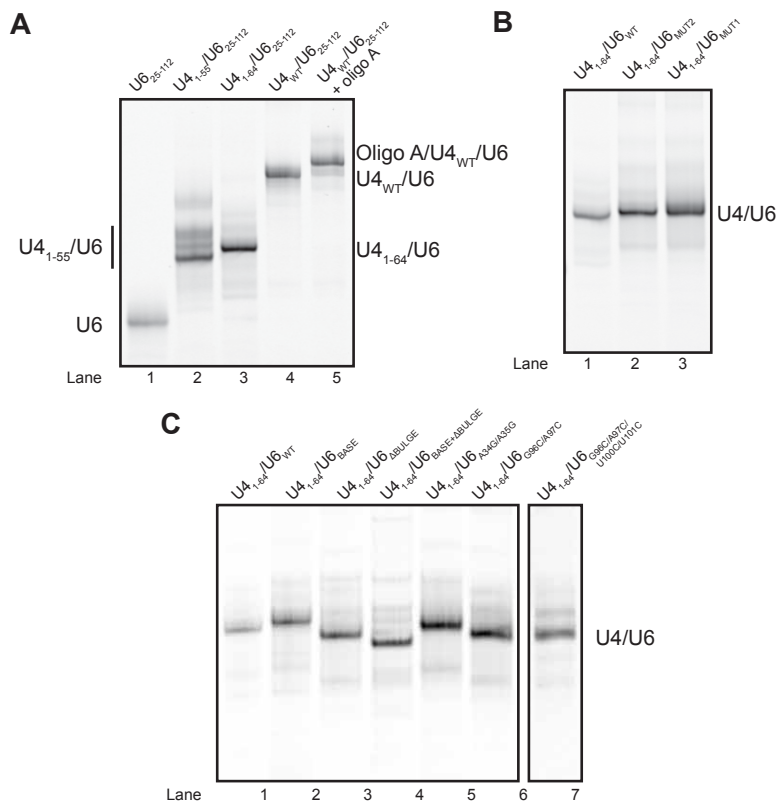

**Supplemental Figure 2.** Native gel analysis of complex formation between fluorescent U6 and non-fluorescent U4 RNAs. RNAs were analyzed by 6% nondenaturing PAGE and gels directly imaged by fluorescence. **(A)** Complex formation between U6<sub>25-112</sub> and U4<sub>1-55</sub> (lane 2), U4<sub>1-64</sub> (lane 3), and U4<sub>WT</sub> (lane 4). The U4<sub>1-55</sub>/U6 complex migrates heterogeneously, possibly due to multiple U6 structures. Ternary complex formation between U4<sub>WT</sub>, U6<sub>WT</sub>, and oligo A is shown in lane 5. **(B)** Complex formation between U4<sub>1-64</sub> and U6<sub>25-112</sub> (lane 1), U6<sub>MUT2</sub> (lane 2), and U6<sub>MUT1</sub> (lane 3). **(C)** Complex formation between U4<sub>1-64</sub> and U6<sub>25-112</sub> (lane 1), U6<sub>BASE</sub> (lane 2), U6<sub>ΔBULGE</sub> (lane 3), U6<sub>BASE+ΔBULGE</sub> (lane 4), U6<sub>A34G/A35G</sub> (lane 5), U6<sub>G96C/A97C</sub> (lane 6), and U6<sub>G96C/A97C/U100C/U101C</sub> (lane 7). Some of the stabilizing mutations cause different mobility on the native gel relative to WT consistent with alternate structures as seen in smFRET experiments.

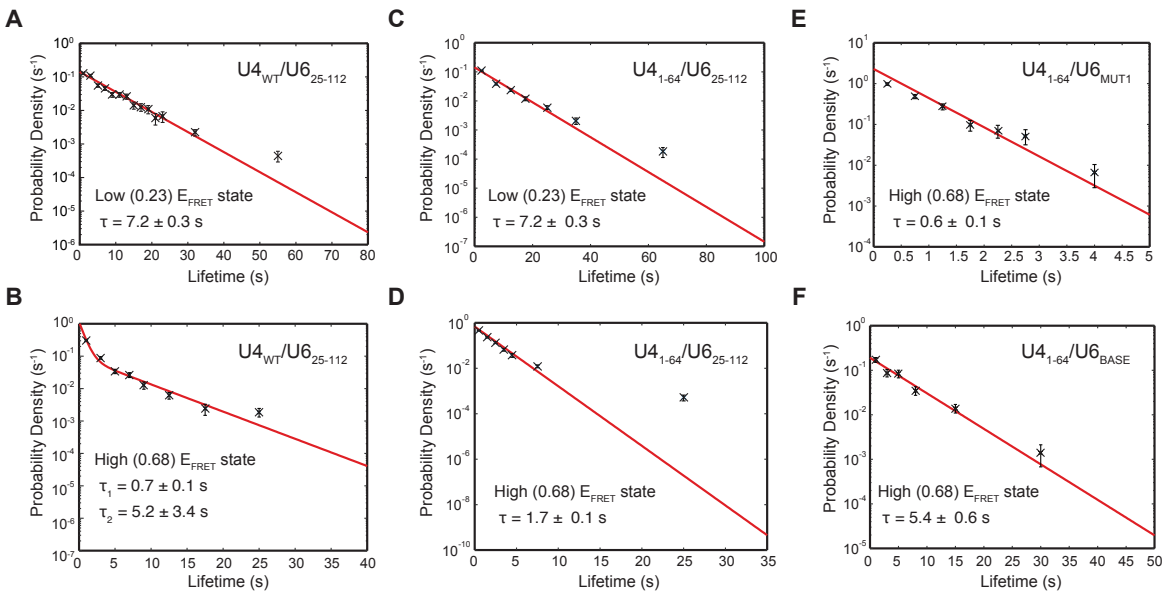

**Supplemental Figure 3.** Probability density histogram of lifetimes for the low and high  $E_{FRET}$  states observed in  $U4_{WT}/U6_{25-112}$  di-RNAs. Points represent bin centers of the histogram. Red lines represent fits of the distributions of lifetimes to equations described in the Materials and Methods. Fit parameters are shown in each box plot. **(A)** Histogram of low  $E_{FRET}$  state lifetimes for  $U4_{WT}/U6_{25-112}$  ( $N = 595$  events on 79 di-RNAs). **(B)** Histogram of high  $E_{FRET}$  state lifetimes for  $U4_{WT}/U6_{25-112}$  ( $N = 584$  events on 79 di-RNAs). **(C)** Histogram of low  $E_{FRET}$  state lifetimes for  $U4_{1-64}/U6_{25-112}$  ( $N = 772$  events on 80 di-RNAs). **(D)** Histogram of high  $E_{FRET}$  state lifetimes for  $U4_{1-64}/U6_{25-112}$  ( $N = 777$  events on 80 di-RNAs). **(E)** Histogram of high  $E_{FRET}$  state lifetimes for  $U4_{1-64}/U6_{MUT1}$  ( $N = 227$  events on 63 di-RNAs). **(F)** Histogram of high  $E_{FRET}$  state lifetimes for  $U4_{1-64}/U6_{BASE}$  ( $N = 143$  events on 74 di-RNAs). Error bars represent the error in counting statistics for each bin as calculated by the variance for a binomial distribution.

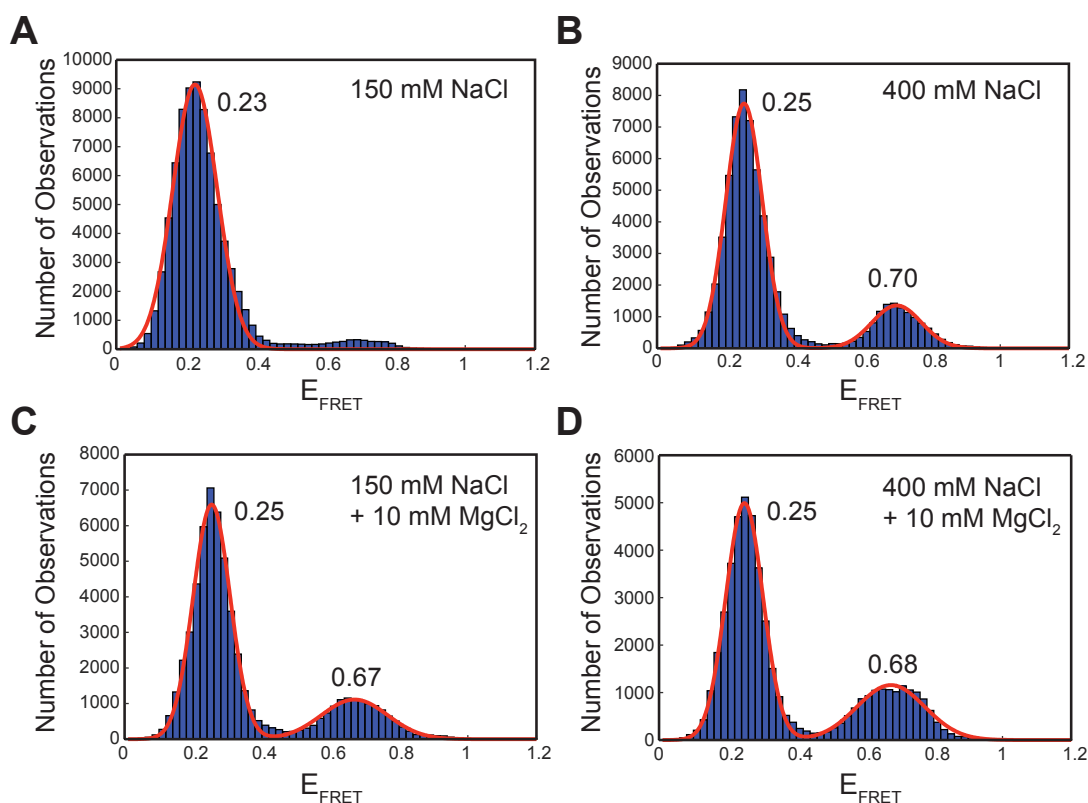

**Supplemental Figure 4.** Impact of monovalent and divalent cations on U4<sub>WT</sub>/U6<sub>25-112</sub> smFRET dynamics. **(A)** Histogram of  $E_{\text{FRET}}$  values obtained from single molecules of U4<sub>WT</sub>/U6<sub>25-112</sub> ( $N = 141$ ) at 150 mM NaCl. The distribution could be fit to a single Gaussian function centered at  $0.23 \pm 0.01$  (red line). **(B)** Histogram of  $E_{\text{FRET}}$  values obtained from single molecules of U4<sub>WT</sub>/U6<sub>25-112</sub> ( $N = 111$ ) at 400 mM NaCl. The distribution could be fit to a sum of two Gaussian functions centered at  $0.25 \pm 0.01$  and  $0.70 \pm 0.01$  (red line). **(C)** Histogram of  $E_{\text{FRET}}$  values obtained from single molecules of U4<sub>WT</sub>/U6<sub>25-112</sub> ( $N = 118$ ) at 150 mM NaCl, 10 mM MgCl<sub>2</sub>. The distribution could be fit to a sum of two Gaussian functions centered at  $0.25 \pm 0.01$  and  $0.67 \pm 0.01$  (red line). **(D)** Histogram of  $E_{\text{FRET}}$  values obtained from single molecules of U4<sub>WT</sub>/U6<sub>25-112</sub> ( $N = 114$ ) at 400 mM NaCl, 10 mM MgCl<sub>2</sub>. The distribution could be fit to a sum of two Gaussian functions centered at  $0.25 \pm 0.01$  and  $0.68 \pm 0.01$  (red line).

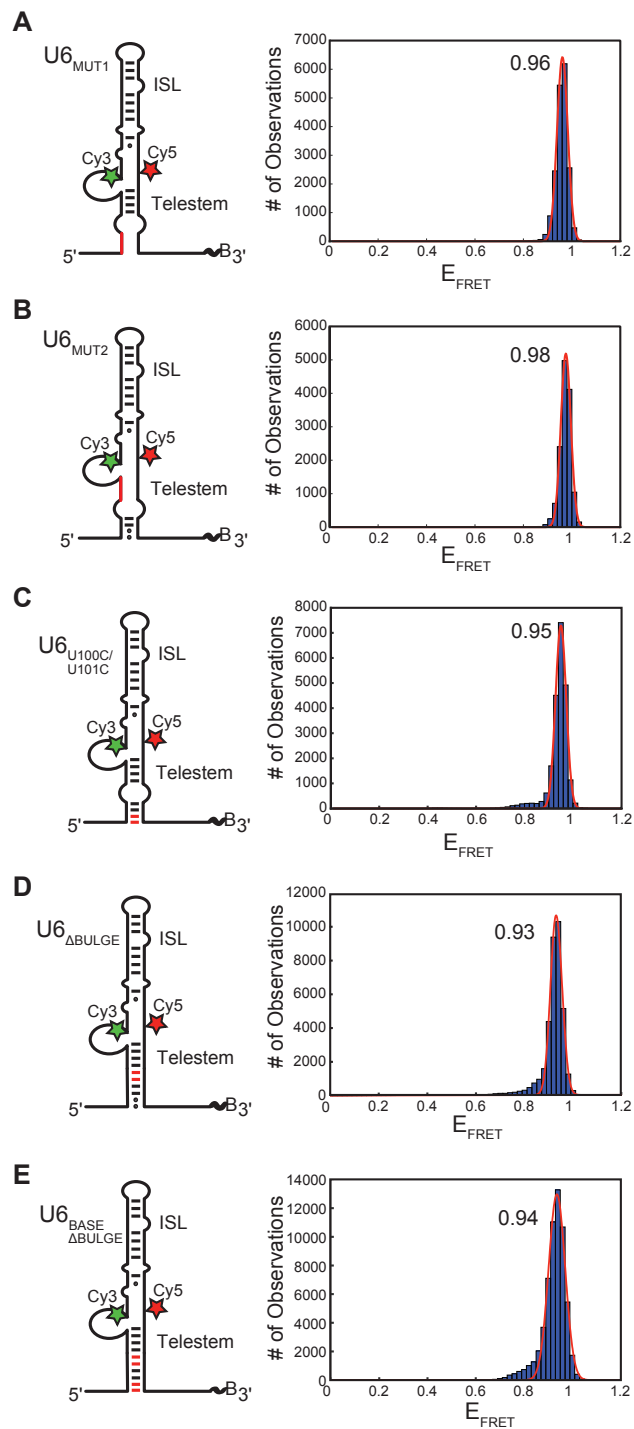

**Supplemental Figure 5.** U6 telestem mutants have the same  $E_{\text{FRET}}$  distribution as  $U6_{\text{WT}}$  in the absence of U4. **(A, Left)** Cartoon of  $U6_{\text{Mut1}}$  showing the location of the telestem mutation in red. **(A, Right)** Histogram of  $E_{\text{FRET}}$  values obtained from single

molecules of  $U6_{Mut1}$  ( $N = 68$ ). The distribution could be to a single Gaussian distribution centered at  $0.96 \pm 0.01$  (red line). **(B, Left)** Cartoon of  $U6_{Mut2}$  showing the location of the telestem mutation in red. **(B, Right)** Histogram of  $E_{FRET}$  values obtained from single molecules of  $U6_{Mut2}$  ( $N = 62$ ). The distribution could be to a single Gaussian distribution centered at  $0.98 \pm 0.01$  (red line). **(C, Left)** Cartoon of  $U6_{BASE}$  showing the location of the telestem mutation in red. **(C, Right)** Histogram of  $E_{FRET}$  values obtained from single molecules of  $U6_{BASE}$  ( $N = 74$ ). The distribution could be to a single Gaussian distribution centered at  $0.95 \pm 0.01$  (red line). **(D, Left)** Cartoon of  $U6_{\Delta BULGE}$  showing the location of the telestem mutation in red. **(D, Right)** Histogram of  $E_{FRET}$  values obtained from single molecules of  $U6_{\Delta BULGE}$  ( $N = 103$ ). The distribution could be to a single Gaussian distribution centered at  $0.93 \pm 0.01$  (red line). **(E, Left)** Cartoon of  $U6_{BASE+\Delta BULGE}$  showing the location of the telestem mutation in red. **(E, Right)** Histogram of  $E_{FRET}$  values obtained from single molecules of  $U6_{BASE+\Delta BULGE}$  ( $N = 102$ ). The distribution could be to a single Gaussian distribution centered at  $0.94 \pm 0.01$  (red line).

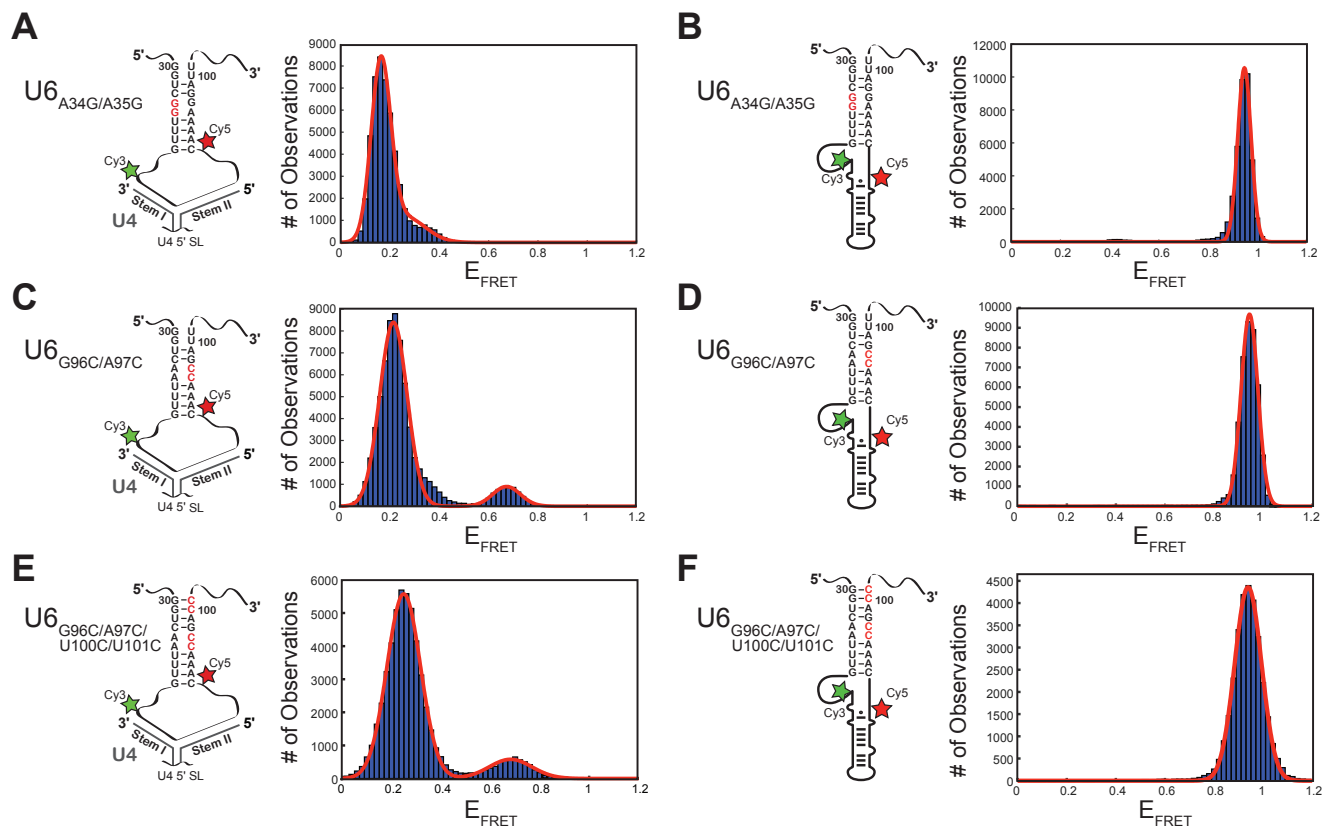

**Supplemental Figure 6.** Single strand mutations of the telestem stabilizing U6 RNAs used in smFRET experiments differentially influence the observed U4/U6 dynamics but do not impact FRET observed with U6 alone. **(A, Left)** Cartoon of U6<sub>A34G/A35G</sub> showing the location of the telestem mutation in red. **(A, Right)** Histogram of  $E_{\text{FRET}}$  values obtained from single molecules of U6<sub>A34G/A35G</sub> ( $N = 108$ ). The distribution could be to the sum of two Gaussians centered at  $0.16 \pm 0.01$  and  $0.26 \pm 0.06$  (red line). **(B, Left)** Cartoon of U6<sub>G96C/A97C</sub> showing the location of the telestem mutation in red. **(B, Right)** Histogram of  $E_{\text{FRET}}$  values obtained from single molecules of U6<sub>G96C/A97C</sub> ( $N = 114$ ). The distribution could be to the sum of two Gaussians centered at  $0.21 \pm 0.01$  and  $0.67 \pm 0.02$  (red line). **(C, Left)** Cartoon of U6<sub>G96C/A97C/U100C/U101C</sub> showing the location of the telestem mutation in red. **(C, Right)** Histogram of  $E_{\text{FRET}}$  values obtained from single molecules of U6<sub>G96C/A97C/U100C/U101C</sub> ( $N = 100$ ). The distribution could be to the sum of



two Gaussians centered at  $0.25 \pm 0.01$  and  $0.68 \pm 0.01$  (red line). **(D, Left)** Cartoon of  $U6_{A34G/A35G}$  showing the location of the telestem mutation in red. **(D, Right)** Histogram of  $E_{FRET}$  values obtained from single molecules of  $U6_{A34G/A35G}$  ( $N = 128$ ). The distribution could be to a single Gaussian distribution centered at  $0.95 \pm 0.01$  (red line). **(E, Left)** Cartoon of  $U6_{G96C/A97C}$  showing the location of the telestem mutation in red. **(E, Right)** Histogram of  $E_{FRET}$  values obtained from single molecules of  $U6_{G96C/A97C}$  ( $N = 104$ ). The distribution could be to a single Gaussian distribution centered at  $0.95 \pm 0.01$  (red line). **(F, Left)** Cartoon of  $U6_{G96C/A97C/U100C/U101C}$  showing the location of the telestem mutation in red. **(F, Right)** Histogram of  $E_{FRET}$  values obtained from single molecules of  $U6_{G96C/A97C/U100C/U101C}$  ( $N = 106$ ). The distribution could be to a single Gaussian distribution centered at  $0.94 \pm 0.01$  (red line).

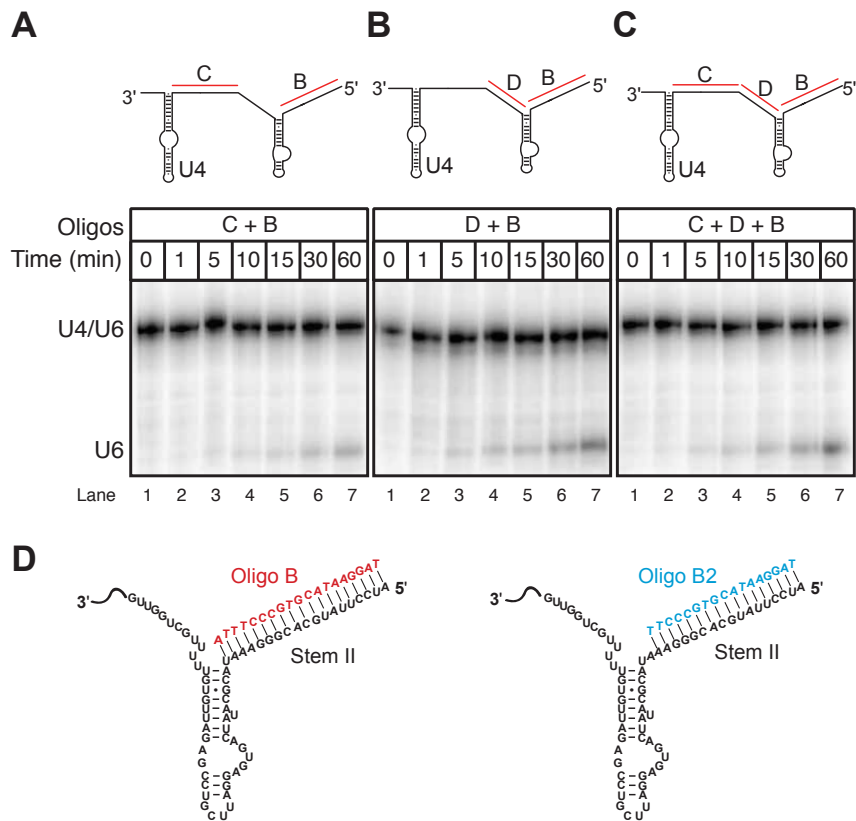

**Supplemental Figure 7.** Oligos incapable of both forming a toehold on U4 and strand invasion of U4/U6 stem I do not support rapid U4/U6 unwinding when mixed with unwinding oligo B. **(A)** Unwinding observed upon mixing U4<sub>WT</sub>/U6<sub>WT</sub> with oligos B and C, which binds the ssRNA region of U4 to create a toehold but is incapable of strand invasion of stem I. Replicate experiments were used to obtain a fitted unwinding rate of  $0.011 \pm 0.007 \text{ min}^{-1}$ . **(B)** Unwinding observed upon mixing U4<sub>WT</sub>/U6<sub>WT</sub> with oligos B and D, which binds stem I but is incapable of forming a toehold. Replicate experiments were used to obtain a fitted unwinding rate of  $0.005 \pm 0.003 \text{ min}^{-1}$ . **(C)** Unwinding observed upon mixing oligos B, C, and D with U4<sub>WT</sub>/U6<sub>WT</sub>. Replicate experiments were used to obtain a fitted unwinding rate of  $0.018 \pm 0.008 \text{ min}^{-1}$ . **(D)** Difference between oligo B and B2 in binding to U4 RNA. Oligo B2 is two nucleotides shorter near the three-helix junction.

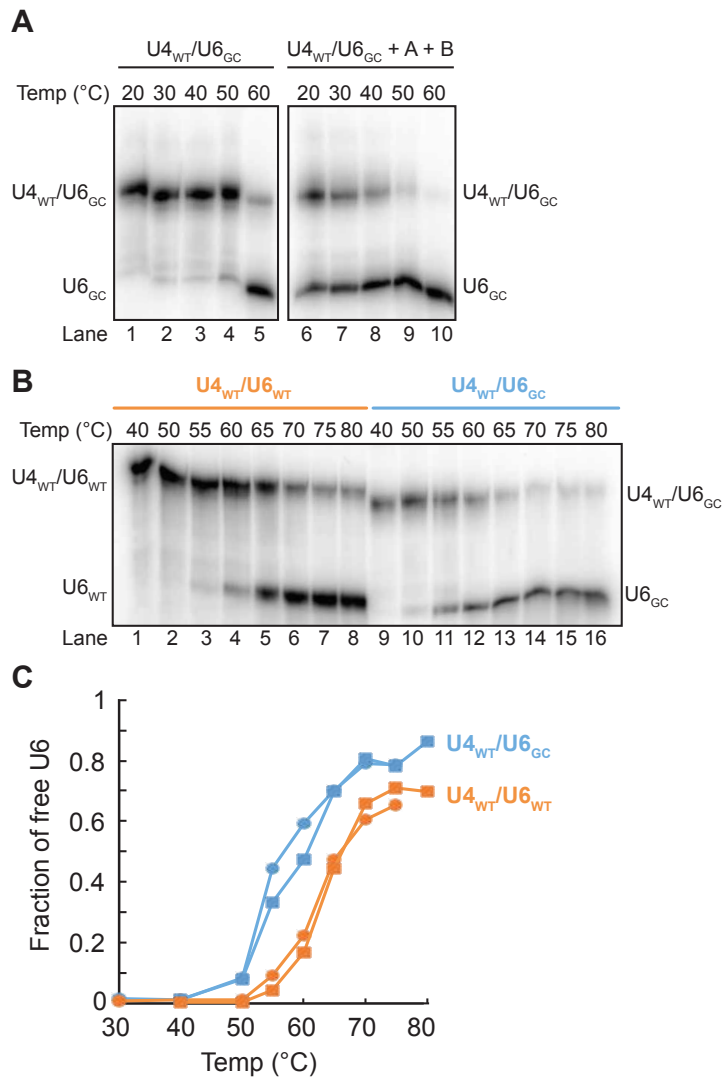

**Supplemental Figure 8.** U4<sub>WT</sub>/U6<sub>GC</sub> undergoes unwinding at a lower temperature than U4<sub>WT</sub>/U6<sub>WT</sub> in the presence and absence of oligos A and B. **(A)** U4<sub>WT</sub>/U6<sub>GC</sub> was diluted to 25 nM in annealing buffer with 400 mM NaCl in the absence (Lanes 1-5) or presence (Lanes 6-10) of oligos A and B and then incubated at the indicated temperatures for 10 min. Samples were then analyzed by nondenaturing PAGE **(B)** U4/U6 unwinding was followed in the absence of oligos at temperatures from 40-80°C following procedures described in (A). **(C)** Quantification of the data shown in (B) along with an additional replicate. U4<sub>WT</sub>/U6<sub>GC</sub> forms a larger amount of free U6 at temperatures above 40°C than does U4<sub>WT</sub>/U6<sub>WT</sub>.

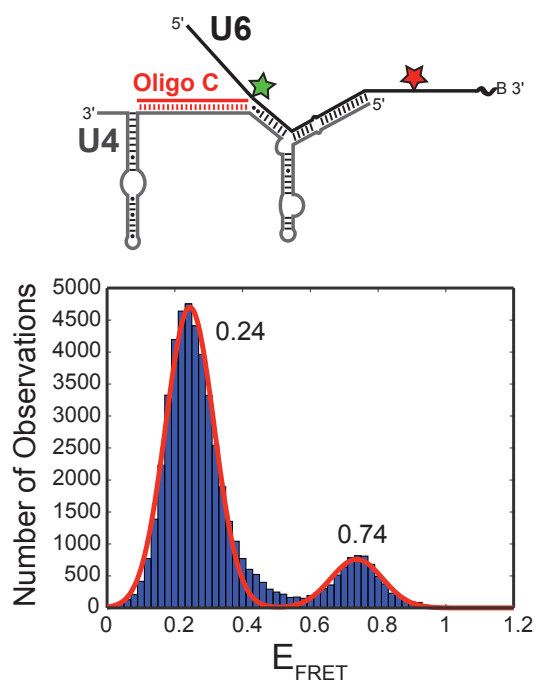

**Supplemental Figure 9.** Oligo C does not induce formation of new  $E_{\text{FRET}}$  states in  $U4_{\text{WT}}/U6_{25-112}$ . (Top) Cartoon of the oligo C/ $U4_{\text{WT}}/U6_{25-112}$  ternary complex. (Bottom) Histogram of  $E_{\text{FRET}}$  values obtained from single molecules of oligo C/ $U4_{\text{WT}}/U6_{25-112}$  ( $N = 90$ ). The distribution could be fit to a sum of two Gaussian functions centered at  $0.24 \pm 0.01$  and  $0.74 \pm 0.02$  (red line).

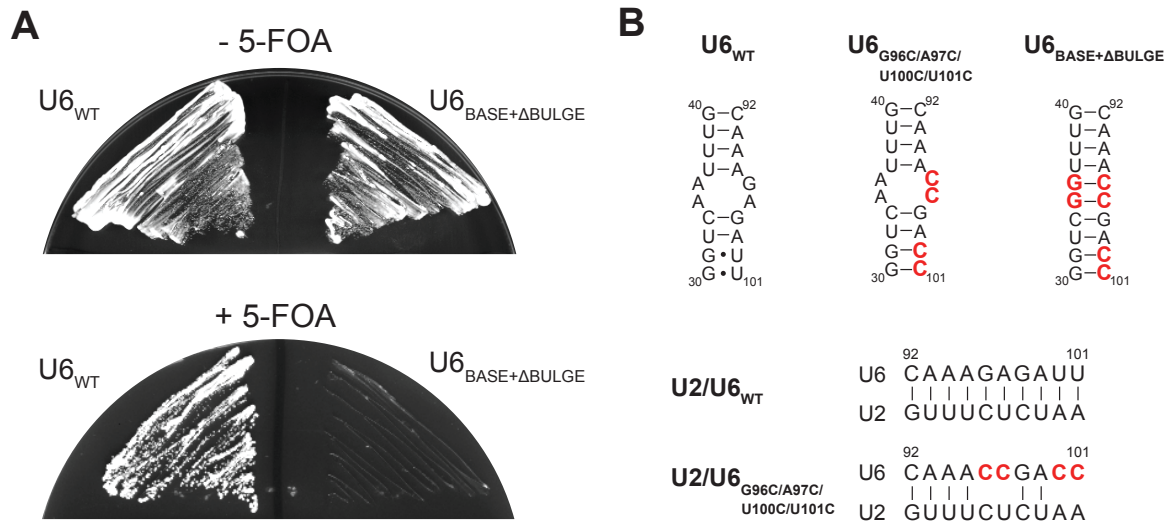

**Supplemental Figure 10.** U6<sub>BASE+ΔBULGE</sub> is not viable after 5-FOA selection at 30°C. (A) Shown are photographs of single colonies of yeast streaked onto –TRP, –HIS dropout plates that either lack (top) or contain (bottom) 5-FOA. Yeast were transformed with plasmids encoding U6<sub>WT</sub> or U6<sub>BASE+ΔBULGE</sub>, along with U4<sub>WT</sub>. (B) Secondary structure comparison between the U6 telestem and U2/U6 helix II. The 3' strand mutations, in particular, the U6<sub>G96C/A97C/U100C/U101C</sub> mutation, destabilize U2/U6 helix II.

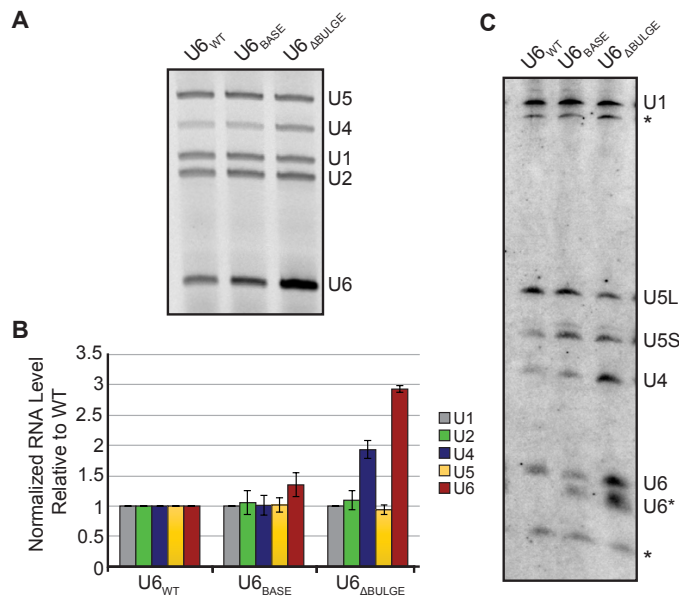

**Supplemental Figure 11.** Analysis of RNA levels in U6<sub>WT</sub>, U6<sub>BASE</sub>, and U6<sub>ΔBULGE</sub> strains. **(A)** Primer extension of total cellular RNA isolated from indicated yeast strains using Cy5-labeled primers against U1, U2, U4, U5 and U6. **(B)** Quantification of primer extension analysis for each snRNA. Each RNA level was normalized to U1 RNA level to account for any differences in the amount of total RNA present in the primer extension reaction. Plotted is the average of three biological replicates relative to U6<sub>WT</sub> and error bars represent the standard deviation. **(C)** Northern blot of total cellular RNAs isolated from indicated yeast strains and probed with [<sup>32</sup>P]-labeled oligos complementary to the U1, U4, U5, and U6 snRNAs. An equivalent amount of RNA (5 μg) was loaded in each lane. U6\* indicates smaller U6 snRNAs. Asterisks represent uncharacterized RNA species appearing below U1 and U6 when probed with oligos complementary to U4 and U6, respectively.

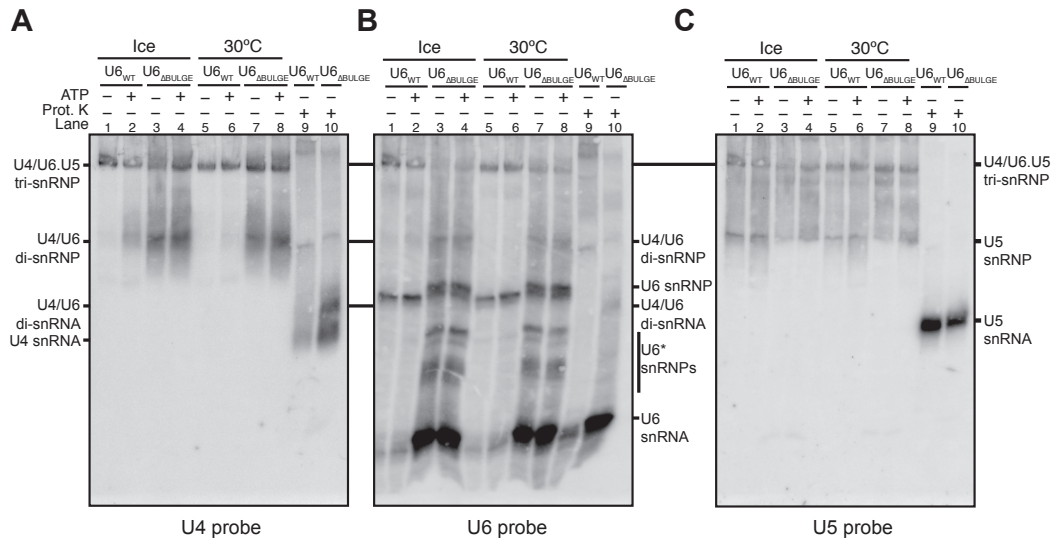

**Supplemental Figure 12.** Uncropped image of the native Northern blot from Figure 7 in the main text. The extracts were incubated either at 30°C or on ice prior to electrophoresis. The difference in snRNP distribution between the two incubation procedures is minimal.

**Supplemental Table 1.** Fluorescent U6 RNAs for smFRET

| Construct                                     | Sequence                                                                                                     |
|-----------------------------------------------|--------------------------------------------------------------------------------------------------------------|
| 5' FRAG<br>U6 <sub>25-112</sub><br>(U54)      | 5' - AUUUGGUCAAUUUGAAACAAUACAGAGA/ <i>iAmMC6T</i> /GAUCA<br>GCAGUCCCCUGCAU - 3'                              |
| 3' FRAG<br>U6 <sub>25-112</sub><br>(U90)      | 5' - AAGGAUGAACCGUUU/ <i>iAmMC6T</i> /ACAAAGAGAUUUUUUUUCGU<br>UUUGUCUUCUAUUUAAUUUUUCCC/3'BIO/ - 3'           |
| 5' FRAG<br>U6 <sub>25-112</sub><br>(U46)      | 5' - AUUUGGUCAAUUUGAAACAA/ <i>iAmMC6T</i> /ACAGAGAUGAUCAG<br>CAGUCCCCUGCAU - 3'                              |
| 5' FRAG<br>U6 <sub>MUT1</sub><br>(U54)        | 5' - AUUUUUCGAAUUUGAAACAAAUCAGAGA/ <i>iAmMC6T</i> /GAUCAG<br>CAGUCCCCUGCAU - 3'                              |
| 5' FRAG<br>U6 <sub>MUT2</sub><br>(U54)        | 5' - AUUUGGUCAA <b>GGCC</b> AAACAAUACAGAGA/ <i>iAmMC6T</i> /GAUCAG<br>CAGUCCCCUGCAU - 3'                     |
| 3' FRAG<br>U6 <sub>BASE</sub><br>(U90)        | 5' - AAGGAUGAACCGUUU/ <i>iAmMC6T</i> /ACAAAGAGAC <b>CC</b> UAUUUUCGU<br>UUUGUCUUCUAUUUAAUUUUUCCC/3'BIO/ - 3' |
| 5' FRAG<br>U6 <sub>ΔBULGE</sub><br>(U54)      | 5' - AUUUGGUC <b>GG</b> UUUGAAACAA/ <i>iAmMC6T</i> /ACAGAGAUGAUCAG<br>CAGUCCCCUGCAU - 3'                     |
| 3' FRAG<br>U6 <sub>ΔBULGE</sub><br>(U90)      | 5' - AAGGAUGAACCGUUU/ <i>iAmMC6T</i> /ACAA <b>CC</b> GAUUUUUUUCGU<br>UUUGUCUUCUAUUUAAUUUUUCCC/3'BIO/ - 3'    |
| 3' FRAG<br>U6 <sub>ΔBULGE+BASE</sub><br>(U54) | 5' - AAGGAUGAACCGUUU/ <i>iAmMC6T</i> /ACAA <b>CCGACC</b> UAUUUUCGU<br>UUUGUCUUCUAUUUAAUUUUUCCC/3'BIO/ - 3'   |
| U6 ligation<br>DNA splint                     | 5' – CTCTTTGTAAAACGGTTCATCCTTATGCAGGGGAACTGCTGAT<br>CATCTCTGTATTG - 3'                                       |

C6-aminoallyl modifications are indicated with /iAmMC6T/ with colors indicating either Cy3 (green) or Cy5 (red) labeling. Mutations in the U6 RNA are highlighted in blue.



**Supplemental Table 2.** Nucleotide sequences of nonfluorescent RNAs

| Construct           | Sequence                                                                                                                                                                                   |
|---------------------|--------------------------------------------------------------------------------------------------------------------------------------------------------------------------------------------|
| U4 <sub>WT</sub>    | 5' – GGAUCCUUAUGCACGGGAAAUACGCAUAUCAGUGAG<br>GAUUCGUCCGAGAUUGUGUUUUUGCUGGUUGAAAUUUAU<br>UAUAAACCAGACCGUCUCCUCAUGGUCAAUUCGGUGUUCG<br>CUUUUGAAUACUUCAAGACUAUGUAGGGAAUUUUUGGAU<br>ACCUUU - 3' |
| U4 <sub>1-64</sub>  | 5' – GGAUCCUUAUGCACGGGAAAUACGCAUAUCAGUGAGG<br>AUUCGUCCGAGAUUGUGUUUUUGCUGGUU - 3'                                                                                                           |
| U4 <sub>1-55</sub>  | 5' – GGAUCCUUAUGCACGGGAAAUACGCAUAUCAGUGAGG<br>AUUCGUCCGAGAUUGUGUUU - 3'                                                                                                                    |
| U6 <sub>WT</sub>    | 5' – GGUUCGCGAAGUAACCCUUCGUGGACAUUUGGUCAA<br>UUUGAAACAAUACAGAGAUGAUCAGCAGUCCCCUGCAUA<br>AGGAUGAACCGUUUUACAAAGAGAUUUUUAUUUCGUUUU - 3'                                                       |
| U6 <sub>GC</sub>    | 5' – GGUUCGCGAAGUAACCCUUCGUGGACAUUUGG <b>CCGG</b><br>UUUGAAACAAUACAGAGAUGAUCAGCAGUCCCCUGCAUA<br>AGGAUGAACCGUUUUACAA <b>CCGGCC</b> UAUUUCGUUUU - 3'                                         |
| U6 <sub>49-88</sub> | 5' - AGAGA/iAmMC6T/GAUCAGCAGUCCCCUGCAUAAGGA<br>UGAACCGU - 3'                                                                                                                               |

GC substitutions in U6<sub>GC</sub> are shown in red.

**Supplemental Table 3.** DNA oligos used for U4/U6 unwinding assays

| Oligo name | Sequence                                         | Notes                            |
|------------|--------------------------------------------------|----------------------------------|
| A          | 5' – GACGGTCTGGTTTATAATTAATTTC<br>AACCAGCAA - 3' | Complementary to<br>U4 nts 56-91 |
| B          | 5' - ATTTCCCGTGCATAAGGAT - 3'                    | Complementary to<br>U4 nts 1-19  |
| B2         | 5' - TTCCCGTGCATAAGGAT - 3'                      | Complementary to<br>U4 nts 1-17  |
| C          | 5' - GACGGTCTGGTTTATAATTAATTT - 3'               | Complementary to<br>U4 nts 66-91 |
| D          | 5' - CAACCAGCGGGAA - 3'                          | Complementary to<br>U4 nts 53-65 |

**Supplemental Table 4.** Plasmids used in this study

| Plasmid ID | Common Name                                | Description                                              |
|------------|--------------------------------------------|----------------------------------------------------------|
| pAAH0413   | pRS313-U4 <sub>WT</sub>                    | HIS3/CEN encoding U4 <sub>WT</sub>                       |
| pAAH0412   | pRS314-U6 <sub>WT</sub>                    | TRP1/CEN encoding U6 <sub>WT</sub>                       |
| pAAH0428   | pRS314-U6 <sub>A34G/A35G</sub>             | TRP1/CEN encoding U6 <sub>A34G/A35G</sub>                |
| pAAH0429   | pRS314-U6 <sub>G96C/A97C</sub>             | TRP1/CEN encoding U6 <sub>G96C/A97C</sub>                |
| pAAH0430   | pRS314-U6 <sub>BASE</sub>                  | TRP1/CEN encoding U6 <sub>BASE</sub>                     |
| pAAH0702   | pRS314-U6 <sub>ΔBULGE</sub>                | TRP1/CEN encoding U6 <sub>ΔBULGE</sub>                   |
| pAAH0704   | pRS314-U6 <sub>G96C/A97C/U100C/U101C</sub> | TRP1/CEN encoding<br>U6 <sub>G96C/A97C/U100C/U101C</sub> |
| pAAH0703   | pRS314 <sub>BASE+ΔBULGE</sub>              | TRP1/CEN encoding U6 <sub>BASE+ΔBULGE</sub>              |

Plasmids pAAH0413, and pAAH0412 have been previously described by McManus *et al.* (1).

**Supplemental Table 5.** Yeast strains used in this study

| Strain ID | Genotype                                                                                      | Description                                                              |
|-----------|-----------------------------------------------------------------------------------------------|--------------------------------------------------------------------------|
| CJM000    | <i>MATa, snr6::LEU2, snr14::trp1::ADE2, trp1, ura3, lys2, his3, ade2</i> [pRS316-U4wt-U6mini] | Shuffle strain for U4 and U6                                             |
| yAAH0431  | CJM000 + pAAH0413 + pAAH0412                                                                  | Strain expressing U4 <sub>WT</sub> , U6 <sub>WT</sub>                    |
| yAAH1552  | CJM000 + pAAH0413 + pAAH0428                                                                  | Strain expressing U4 <sub>WT</sub> , U6 <sub>A34G/A35G</sub>             |
| yAAH1553  | CJM000 + pAAH0413 + pAAH0429                                                                  | Strain expressing U4 <sub>WT</sub> , U6 <sub>G96C/A97C</sub>             |
| yAAH0432  | CJM000 + pAAH0413 + pAAH0430                                                                  | Strain expressing U4 <sub>WT</sub> , U6 <sub>BASE</sub>                  |
| yAAH1554  | CJM000 + pAAH0413 + pAAH0702                                                                  | Strain expressing U4 <sub>WT</sub> , U6 <sub>ΔBULGE</sub>                |
| yAAH1555  | CJM000 + pAAH0413 + pAAH0704                                                                  | Strain expressing U4 <sub>WT</sub> , U6 <sub>G96C/A97C/U100C/U101C</sub> |
| --        | CJM000 + pAAH0413 + pAAH0703                                                                  | Not Viable                                                               |

Strain CJM000 has been previously described by McManus *et al.* (1).

**Supplemental Table 6.** Probes for solution hybridization and Northern blotting

| Probe     | Sequence                                             | Description                                                  |
|-----------|------------------------------------------------------|--------------------------------------------------------------|
| U1-SH     | 5' – CCGTATGTGTGTGTGACC – 3'                         | Used for solution hybridization and native northern analysis |
| SR-U2     | 5' – CAGATACTACACTTG – 3'                            | Used for native northern analysis                            |
| U4-14b    | 5' – AGGTATTCCAAAAATTCCC – 3'                        | Used for solution hybridization and native northern analysis |
| U5B       | 5' – AAGTTCCAAAAAATATGGCAAGC – 3'                    | Used for native northern analysis                            |
| U6-SH     | 5' – ATTGTTTCAAATTGACCAAAT – 3'                      | Used for solution hybridization and native northern analysis |
| U6-SH-MUT | 5' – ATTGTTTCAAACCGACCAAAT – 3'                      | Used for solution hybridization and native northern analysis |
| U1-Long   | 5' – GATCAGTAGGACTTCTTGATCTCCTC<br>TGATATCTTAAG – 3' | Used for denaturing northern analysis                        |
| U4-Long   | 5' – GCAAAAACACAATCTCGGACGAATCC<br>TCACTG – 3'       | Used for denaturing northern analysis                        |
| U5-Long   | 5' – GCAAGAACCATGTTTCGTTATAGTTCT<br>ATAGGC – 3'      | Used for denaturing northern analysis                        |
| U6-Long   | 5' – CCAAATGTCCACGAAGGGTACTTCG<br>CGAAC – 3'         | Used for denaturing northern analysis                        |

Probes for solution hybridization and native northern analysis were obtained from Burke et al. and references therein (2).

**Supplemental Table 7.** Fluorescent primers used for primer extension

| Primer      | Sequence                                      |
|-------------|-----------------------------------------------|
| Cy5_U1RT136 | 5' – /5Cy5/GACCAAGGAGTTTGCATCAATGAC – 3'      |
| XC5         | 5' – /5Cy5/TTTGGGTGCCAAAAAATGTGTATTGTAAC – 3' |
| XC6         | 5' – /5Cy5/GGTATTCCAAAAATCCCTACATAGTC – 3'    |
| XC7         | 5' – /5Cy5/AAGTTCCAAAAATATGGCAAGC – 3'        |
| XC9         | 5' – /5Cy5/TCATCCTTATGCAGGGGAACTG – 3'        |

Primer extension primers were adapted from McGrail et al. (3).

#### Supplemental References

1. McManus, C.J., Schwartz, M.L., Butcher, S.E. and Brow, D.A. (2007) A dynamic bulge in the U6 RNA internal stem-loop functions in spliceosome assembly and activation. *RNA*, **13**, 2252–2265.
2. Burke, J.E., Butcher, S.E. and Brow, D.A. (2015) Spliceosome assembly in the absence of stable U4/U6 RNA pairing. *RNA*, **21**, 923–934.
3. McGrail, J.C., Krause, A. and O'Keefe, R.T. (2009) The RNA binding protein Cwc2 interacts directly with the U6 snRNA to link the nineteen complex to the spliceosome during pre-mRNA splicing. *Nucleic Acids Research*, **37**, 4205–4217.
